# Supplementary material
Source: MDPI journal article supplement (https://www.mdpi.com/2073-445X/7/2/59)
Supplement: s1 [file s1]

**Hongmi Koo, Janina Kleemann and Christine Fürst**

**Table S1.** Template of the stakeholder survey to select ecosystem services based on the importance related to agricultural land use [1].

Please mark how you think the importance of the suggested ecosystem services related to agricultural land use in the district.

**Table S2.** Template of the stakeholder survey to identify the perceptibility of the differences on the provision of ecosystem services between land use types [1].

Please mark how you think the relative capacity of each land use type to provide suggested ecosystem services (0: no capacity—10:full capacity)

[illegible]

|                     |
|---------------------|
| Artificial surfaces |
| Water bodies        |

**Table S3.** Template of the stakeholder survey for data generation.

Please fill out the approximate percentage to indicate how land use products (e.g., grains, leaves, stalks, and fruits) are used for each benefit (ecosystem services).

| Land Use Types                      | Food | Fodder | Energy | Construction Materials | Marketable Products | Others ( ) | Total |
|-------------------------------------|------|--------|--------|------------------------|---------------------|------------|-------|
| Cereals (millet, sorghum)           | %    | %      | %      | %                      | %                   | %          | 100%  |
| Maize                               | %    | %      | %      | %                      | %                   | %          | 100%  |
| Rice                                | %    | %      | %      | %                      | %                   | %          | 100%  |
| Legumes (groundnuts, bambara beans) | %    | %      | %      | %                      | %                   | %          | 100%  |
| Grasslands                          |      |        |        |                        |                     |            |       |
| Mixed vegetation                    | %    | %      | %      | %                      | %                   | %          | 100%  |
| Tree/forest                         | %    | %      | %      | %                      | %                   | %          | 100%  |
| Artificial surfaces                 | %    | %      | %      | %                      | %                   | %          | 100%  |
| Water bodies                        | %    | %      | %      | %                      | %                   | %          | 100%  |

**Table S4.** Part of a stakeholder survey template for the identification of scenario impacts.

Please mark effects of the each scenario on ecosystem Services considering the potential changes of the services from the current land use types to the future types.

| Cereal-Dominated Intercropping: Conversion from Cereal to Cereal-Legume Intercropping |          |           |          |                      |
|---------------------------------------------------------------------------------------|----------|-----------|----------|----------------------|
| Ecosystem Services                                                                    | Increase | No Change | Decrease | Extent of Change (%) |
| Food                                                                                  |          |           |          |                      |
| Fodder                                                                                |          |           |          |                      |
| Energy                                                                                |          |           |          |                      |
| Construction                                                                          |          |           |          |                      |
| Market                                                                                |          |           |          |                      |
| Water                                                                                 |          |           |          |                      |
| Erosion control                                                                       |          |           |          |                      |

**Table S5.** Application conditions of land use scenarios.

| Scenario | Current Land Use Type | Future Land Use Type          | Transition Probability (%) | Conditions             |                    |
|----------|-----------------------|-------------------------------|----------------------------|------------------------|--------------------|
|          |                       |                               |                            | Neighboring Type       | Attribute          |
| 1        | Cereals               | Cereal-dominant intercropping | 90                         | Cereals, legume        | Soil type, run-off |
| 2        | Maize                 | Maize-dominant intercropping  | 80                         | Maize, legume          | Soil type, run-off |
| 3        | Legumes               | Legume-dominant intercropping | 85                         | Cereals, maize, legume | Soil type          |

|    |                  |                                    |    |                                   |                    |
|----|------------------|------------------------------------|----|-----------------------------------|--------------------|
| 4  | Grassland        | Grassland afforestation            | 75 | Tree/forest, grassland            | Soil type          |
| 5  | Mixed vegetation | Mixed vegetation afforestation     | 80 | Tree/forest, mixed vegetation     | Soil type          |
| 6  | Cereals          | Cereal intercropping with mango    | 70 | Cereals, bare/artificial surfaces | Soil type, run-off |
| 7  | Maize            | Maize intercropping with mango     | 70 | Maize, bare/artificial surfaces   | Soil type, run-off |
| 8  | Legumes          | Legume intercropping with mango    | 90 | Legumes, bare/artificial surfaces | Soil type          |
| 9  | Cereals          | Cereal intercropping with leucaena | 80 | Cereals                           | Soil type, run-off |
| 10 | Maize            | Maize intercropping with leucaena  | 70 | Maize                             | Soil type, run-off |
| 11 | Legumes          | Legume intercropping with leucaena | 90 | Legumes                           | Soil type          |
| 12 | Cereals          | Stone or soil bunds on cereals     | 80 | Cereals                           | Soil type, run-off |
| 13 | Maize            | Stone or soil bunds on maize       | 80 | Maize                             | Soil type, run-off |
| 14 | Cereals          | Windbreak on cereals               | 70 | Cereals, legumes                  | Soil type, run-off |
| 15 | Maize            | Windbreak on maize                 | 70 | Maize, legumes                    | Soil type, run-off |

**Table S6.** Impact of land use scenarios on the ecosystem services provision based on a stakeholder survey. Each percentage implies the extent of potential increase or decrease from the supply capacity of the current land use types when a scenario is applied.

| District   | Land Use Scenarios                   | Food(%) | Fodder (%) | Energy (%) | Construction Material (%) | Marketable Product (%) | Water (%) | Erosion Control (%) |
|------------|--------------------------------------|---------|------------|------------|---------------------------|------------------------|-----------|---------------------|
| Bolgatanga | 1 Cereal-dominant intercropping      | 67      | 64         | 18         | 9                         | 56                     | −22       | 75                  |
|            | 2 Maize-dominant intercropping       | 71      | 63         | 15         | 12                        | 63                     | −22       | 63                  |
|            | 3 Legume-dominant intercropping      | 67      | 38         | 34         | 17                        | 53                     | −23       | 31                  |
|            | 4 Grassland afforestation            | 65      | 1          | 66         | 64                        | 53                     | −25       | 38                  |
|            | 5 Mixed vegetation afforestation     | 43      | 6          | 59         | 58                        | 41                     | −22       | 33                  |
|            | 6 Cereal intercropping with mango    | −12     | −5         | 12         | 9                         | 21                     | −32       | 41                  |
|            | 7 Maize intercropping with mango     | −12     | −5         | 12         | 9                         | 21                     | −32       | 41                  |
|            | 8 Legume intercropping with mango    | 43      | 22         | 36         | 24                        | 45                     | −30       | 41                  |
|            | 9 Cereal intercropping with leucaena | 23      | 64         | 35         | 19                        | 27                     | −29       | 57                  |
|            | 10 Maize intercropping with leucaena | 23      | 64         | 35         | 19                        | 27                     | −29       | 57                  |

|       |    |                                    |    |    |    |    |    |     |    |
|-------|----|------------------------------------|----|----|----|----|----|-----|----|
| Bongo | 11 | Legume intercropping with leucaena | 17 | 67 | 36 | 22 | 30 | −25 | 59 |
|       | 12 | Soil or stone bunds on cereal      | 63 | 55 | 47 | 27 | 74 | −25 | 66 |
|       | 13 | Soil or stone bunds on maize       | 63 | 55 | 47 | 27 | 74 | −25 | 66 |
|       | 14 | Windbreak on cereal                | 54 | 51 | 49 | 47 | 46 | −21 | 60 |
|       | 15 | Windbreak on maize                 | 54 | 51 | 49 | 47 | 46 | −21 | 60 |
|       | 1  | Cereal-dominant intercropping      | 60 | 45 | 14 | −6 | 54 | 2   | 47 |
|       | 2  | Maize-dominant intercropping       | 62 | 41 | −2 | 5  | 53 | 4   | 41 |
|       | 3  | Legume-dominant intercropping      | 43 | 17 | 19 | 12 | 54 | −27 | 32 |
|       | 4  | Grassland afforestation            | 40 | 3  | 52 | 52 | 51 | −32 | 46 |
|       | 5  | Mixed vegetation afforestation     | 37 | 33 | 48 | 48 | 40 | −28 | 42 |
|       | 6  | Cereal intercropping with mango    | 26 | 17 | 15 | 11 | 44 | −32 | 26 |
|       | 7  | Maize intercropping with mango     | 26 | 17 | 15 | 11 | 44 | −32 | 26 |
|       | 8  | Legume intercropping with mango    | 45 | 25 | 23 | 20 | 45 | −21 | 36 |
|       | 9  | Cereal intercropping with leucaena | 20 | 51 | 33 | 14 | 22 | −25 | 41 |
|       | 10 | Maize intercropping with leucaena  | 20 | 51 | 33 | 14 | 22 | −25 | 41 |
|       | 11 | Legume intercropping with leucaena | 32 | 55 | 35 | 22 | 38 | −31 | 39 |
|       | 12 | Soil or stone bunds on cereal      | 58 | 50 | 35 | 28 | 48 | −22 | 67 |
|       | 13 | Soil or stone bunds on maize       | 58 | 50 | 35 | 28 | 48 | −22 | 67 |
|       | 14 | Windbreak on cereal                | 40 | 40 | 39 | 40 | 30 | −22 | 45 |
|       | 15 | Windbreak on maize                 | 40 | 40 | 39 | 40 | 30 | −22 | 45 |

## References

1. Koo, H.; Fürst, C. Using local knowledge on ecosystem services for land use impact assessment in Sub-Saharan Africa. *Ecol. Indic.* **2017**, under review.
